# Supplementary material for: Nucleophilic Substitution at Tetracoordinate Phosphorus. Stereochemical Course and Mechanisms of Nucleophilic Displacement Reactions at Phosphorus in Diastereomeric cis- and trans-2-Halogeno-4-methyl-1,3,2-dioxaphosphorinan-2-thiones: Experimental and DFT Studies
Source: MDPI journal article supplement (doi:10.3390/molecules26123655), 2021-06-15
Supplement: s1 [file s1]

# Nucleophilic Substitution at Tetracoordinate Phosphorus. Stereochemical Course and Mechanisms of Nucleophilic Displacement Reactions at Phosphorus in Diastereomeric *cis*- and *trans*-2-Halogeno- 4-methyl-1,3,2-dioxaphosphorinan-2-thiones: Experimental and DFT Studies

Marian Mikołajczyk<sup>1,\*</sup>, Barbara Ziemnicka<sup>1</sup>, Jan Krzywański<sup>1</sup>, Marek Cypryk<sup>2,\*</sup>, Bartłomiej Gostyński<sup>2</sup>

## Supplementary Materials

### Conformational analysis

#### *trans*-6(Cl)

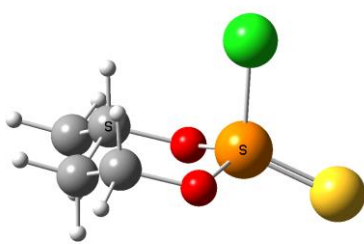

(chair) (Cl-ax, Me-eq)

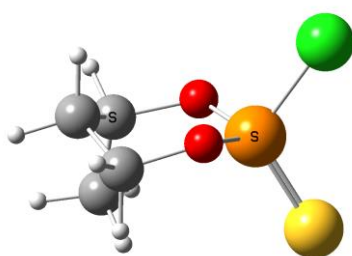

(chair) (Cl-eq, Me-ax)

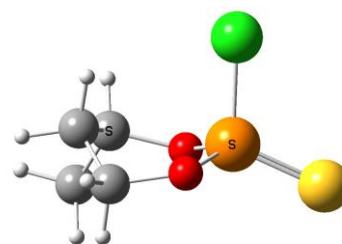

(twisted boat) (Cl-ax, Me-ax)

#### *cis*-6(Cl)

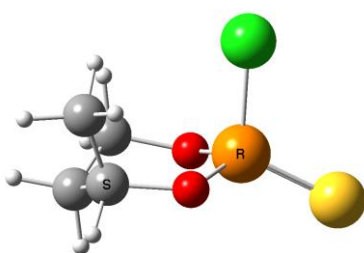

(twisted chair) (Cl-ax, Me-ax)

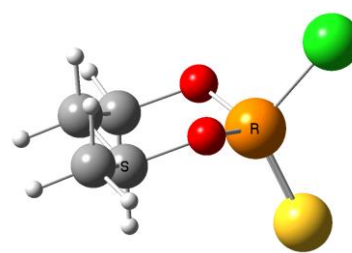

(chair) (Cl-eq, Me-eq)

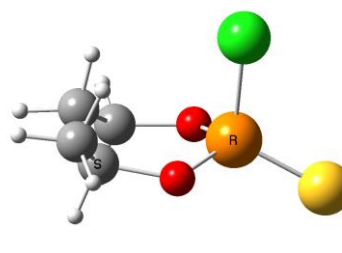

(boat) (Cl-ax, Me-eq)

**Figure S1.** Geometries of *trans* and *cis* isomers of 2-chloro-4-methyl-1,3,2-dioxaphosphorinan-2-thione **6(Cl)**; green – chlorine, orange – phosphorus, yellow – sulfur, red – oxygen, grey – carbon, white - hydrogen.

**Table S1.** Relative Gibbs free energies (kcal/mol) of the most stable conformers of *cis*- and *trans*-2-chloro-4-methyl-1,3,2-dioxaphosphorinan-2-thione **6(Cl)** (for structures see Fig. S1).

| relative geometry                         | $\Delta G_{\text{rel}}$ |
|-------------------------------------------|-------------------------|
| <i>trans</i> (chair) (Cl-ax,Me-eq)        | 0                       |
| <i>trans</i> (chair) (Cl-eq,Me-ax)        | 5.6                     |
| <i>trans</i> (twisted boat) (Cl-ax,Me-ax) | 3.4                     |
| <i>cis</i> (twisted chair) (Cl-ax,Me-ax)  | 3.9                     |
| <i>cis</i> (chair) (Cl-eq,Me-eq)          | 2.7                     |
| <i>cis</i> (boat) (Cl-ax,Me-eq)           | 2.5                     |

*trans*-**6(F)**

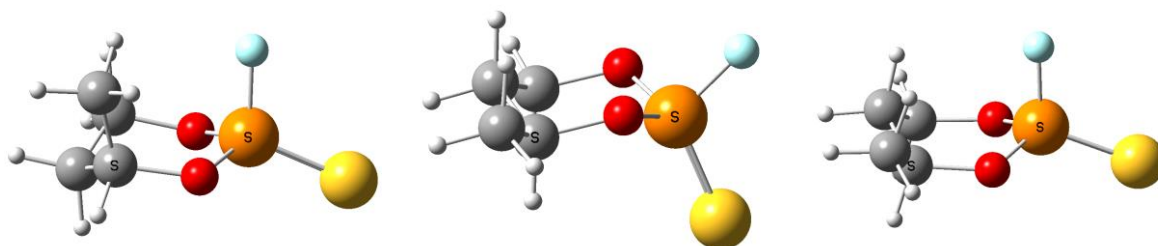

(chair) (F-ax,Me-ax)

(chair) (F-eq,Me-eq)

(boat) (F-ax,Me-eq)

*cis*-**6(F)**

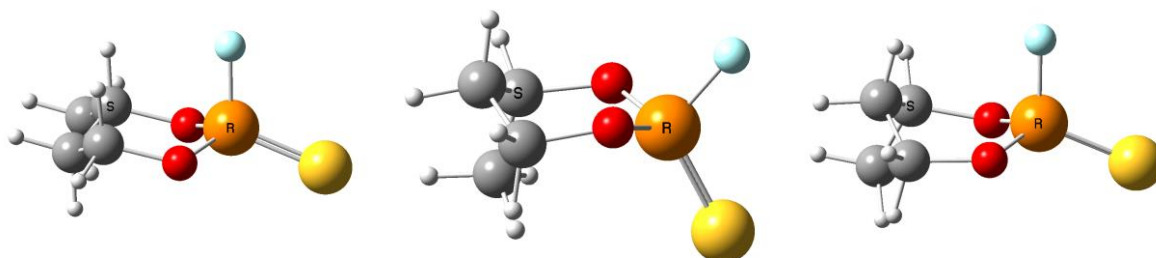

(chair) (F-ax,Me-eq)

(chair) (F-eq,Me-ax)

(boat) (F-ax,Me-ax)

**Figure S2.** Geometries of *cis* and *trans* conformers of 2-fluoro-4-methyl-1,3,2-dioxaphosphorinan-2-thione **6(F)**; cyan – fluorine, remaining colours as in Figure S1.

**Table S2.** Relative Gibbs free energies (kcal/mol) of all isomers of 2-fluoro-4-methyl-1,3,2-dioxaphosphorinan-2-thione **6(F)** (for structures see Fig. S2).

| relative configuration            | $\Delta G_{\text{rel}}$ |
|-----------------------------------|-------------------------|
| <i>cis</i> (chair) (F-ax,Me-eq)   | 0                       |
| <i>cis</i> (chair) (F-eq,Me-ax)   | 4.1                     |
| <i>cis</i> (boat) (F-ax,Me-ax)    | 2.3                     |
| <i>trans</i> (chair) (F-ax,Me-ax) | 2.0                     |
| <i>trans</i> (chair) (F-eq,Me-eq) | 2.5                     |
| <i>trans</i> (boat) (F-ax,Me-eq)  | 1.3                     |

*trans*-9

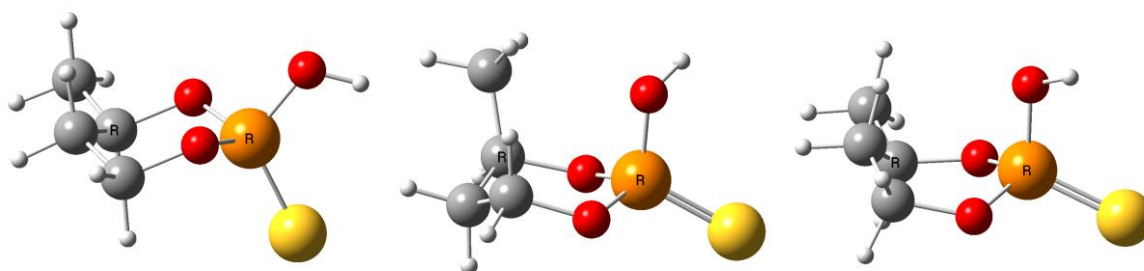

*trans* (chair) (OH-eq,Me-eq)    *trans* (chair) (OH-ax,Me-ax)    *trans* (boat) (OH-ax,Me-eq)

*cis*-9

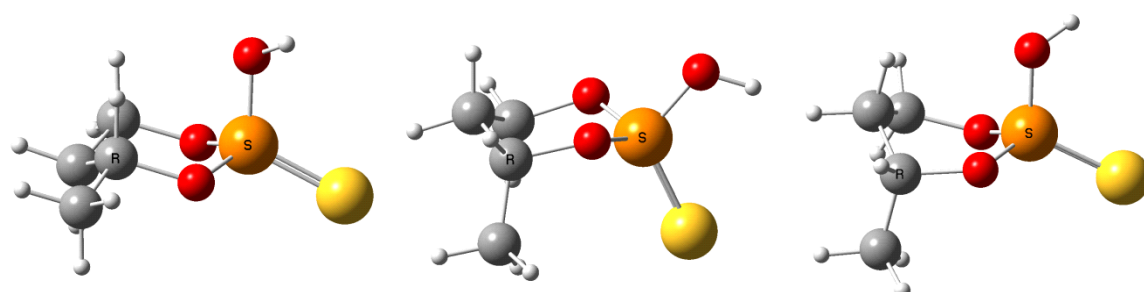

*cis* (chair) (OH-ax,Me-eq)    *cis* (chair) (OH-eq,Me-ax)    *cis* (boat) (OH-ax,Me-ax)

**Figure S3.** Structures of *cis* and *trans* conformers of 2-hydroxy-4-methyl-1,3,2-dioxaphosphorinan-2-thione **9**.

**Table S3.** Relative Gibbs free energies (kcal/mol) of all isomers of 2-hydroxy-4-methyl-1,3,2-dioxaphosphorinan-2-thione **9** (for structures see Fig. S3).

| relative configuration             | $\Delta G_{\text{rel}}$ |
|------------------------------------|-------------------------|
| <i>cis</i> (chair) (OH-ax,Me-eq)   | 0                       |
| <i>cis</i> (chair) (OH-eq,Me-ax)   | 3.2                     |
| <i>cis</i> (boat) (OH-ax,Me-ax)    | 3.3                     |
| <i>trans</i> (chair) (OH-ax,Me-eq) | 2.3                     |
| <i>trans</i> (chair) (OH-ax,Me-ax) | 0.7                     |
| <i>trans</i> (boat) (OH-ax,Me-ax)  | 1.9                     |

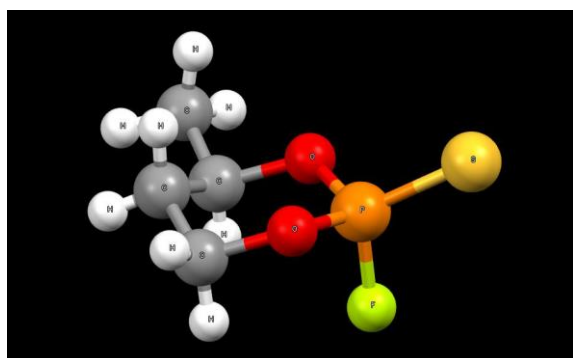

(a)

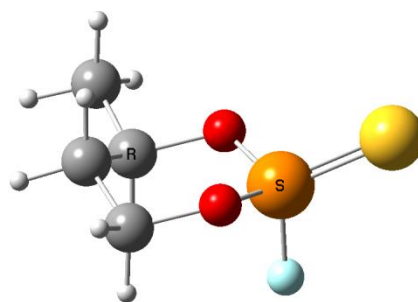

(b)

**Figure S4.** Crystal (a) [ref. 28] and DFT (b) structures of *cis*-2-fluoro-4-methyl-1,3,2-dioxaphosphorinan-2-thione **6(F)**.

**Table S4.** Comparison of X-ray [ref. 28] and DFT selected structural parameters for *cis*-2-fluoro-4-methyl-1,3,2-dioxaphosphorinan-2-thione **6(F)** (bond distances in Å, angles in deg).

|           | X-ray [28] | DFT   |
|-----------|------------|-------|
| Bonds     |            |       |
| P-S       | 1.887      | 1.910 |
| P-F       | 1.558      | 1.583 |
| P-O(Me)   | 1.552      | 1.576 |
| P-O       | 1.555      | 1.579 |
| Angles    |            |       |
| F-P-S     | 112.7      | 113.5 |
| O(Me)-P-S | 115.8      | 115.8 |
| O(Me)-P-F | 102.4      | 102.0 |
| O-P-S     | 115.3      | 115.5 |
| O-P-F     | 102.0      | 101.8 |
| O-P-O(Me) | 107.2      | 106.5 |

## Study of substitution of halogen by hydroxide anion

Hydrolysis of 2-chloro-4-methyl-1,3,2-dioxaphosphorinan-2-thione **6(Cl)**

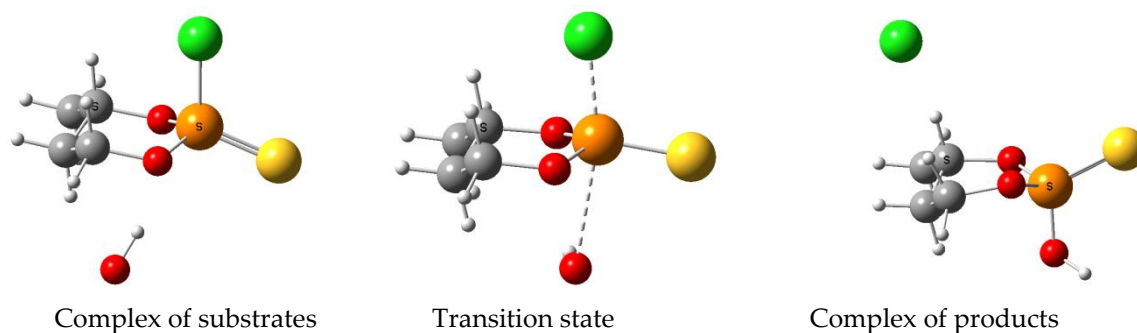

**Figure S5.** Stationary points for the backside attack of hydroxyl anion on chlorothiophosphorinan *trans*-**6(Cl)**.

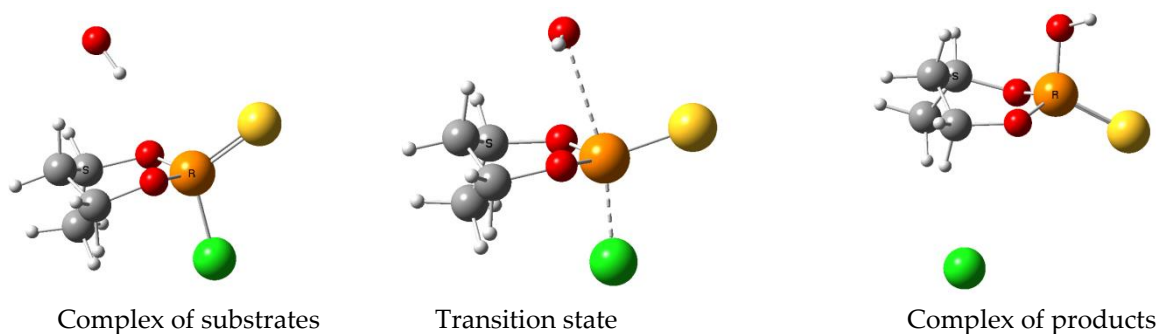

**Figure S6.** Stationary points for the backside attack of hydroxyl anion on chlorothiophosphorinan *cis*-**6(Cl)**.

**Table S5.** Free energies relative to the sum of the free energies of free substrates for the reaction of *trans*- and *cis*-2-chloro-4-methyl-1,3,2-dioxaphosphorinan-2-thione **6(Cl)** with OH<sup>-</sup>.

|                       | <i>trans</i> - <b>6(Cl)</b> |            | <i>cis</i> - <b>6(Cl)</b> |            |
|-----------------------|-----------------------------|------------|---------------------------|------------|
|                       | $\Delta H$                  | $\Delta G$ | $\Delta H$                | $\Delta G$ |
| complex of substrates | -5.4                        | 2.2        | -5.4                      | 3.3        |
| transition state      | 0.8                         | 10.4       | 0.0                       | 10.3       |
| complex of products   | -62.9                       | -56.4      | -61.6                     | -54.8      |
| free products         | -62.7                       | -61.2      | -59.0                     | -58.6      |

Hydrolysis of 2-fluoro-4-methyl-1,3,2-dioxaphosphorinan-2-thione **6(F)**

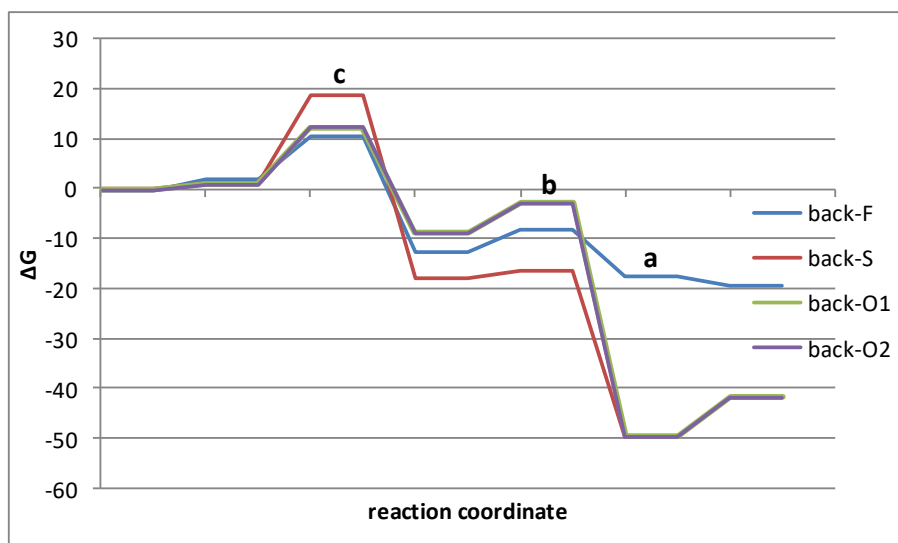

**Figure S7.** Total free energy profiles(kcal/mol) for the three reaction pathways (**a**, **b**, **c** – see Scheme 21 in the main text) of fluoride substitution in *cis*-**6(F)** (path **b** appears in two variants which differ only slightly, so the plots overlap each other).
